# Supplementary material for: Identification of Chalcone Isomerase Family Genes and Roles of CnCHI4 in Flavonoid Metabolism in Camellia nitidissima
Source: MDPI journal article supplement (doi:10.3390/biom13010041), 2022-12-26
Supplement: s1 [file s1]

Supplementary Table S1. Sequences of primers used for gene cloning.

| Target                     | Forward primer (5' to 3')  | Reverse primer (5' to 3')  |
|----------------------------|----------------------------|----------------------------|
| <i>CnCHI4 (to pMD19-T)</i> | GTGCTGAGAGAGAAAGAGAGCA     | ACTCCACAAGACACATGTAGCT     |
| <i>CnMYB7 (to pMD19-T)</i> | GTTAATCTTCATCTATAGTGTCTCCA | CCCAAATTCCTCCAACATAATGCA   |
|                            | ATGGGACGGTCTCCTTGCTG       | TCATTTCATCTCCAAGCTTCTGTAAT |

Supplementary Table S2. Sequences of primers used for overexpression and subcellular localization.

| Target                         | Forward primer (5' to 3')                     | Reverse primer (5' to 3')                     |
|--------------------------------|-----------------------------------------------|-----------------------------------------------|
| <i>CnCHI4 (to Pcambia1302)</i> | CATG <b>CCATGG</b><br>ATGTCTCCATCACAGTCACCGTC | GG <b>ACTAGT</b> TTCAGCAGCAGCAGCTGTCT         |
| <i>CnMYB7 (to pCAMBIA1302)</i> | CATG <b>CCATGGG</b> ACGGTCTCCTTGCTG           | GA <b>AGATCT</b> GC TTTCATCTCCAAGCTTCTGTAATCC |

Supplementary Table S3. Sequences of primers used for the genomic DNA PCR of *Nicotiana tabacum*.

| Target     | Forward primer (5' to 3') | Reverse primer (5' to 3') |
|------------|---------------------------|---------------------------|
| <i>HYG</i> | ATGAAAAAGCCTGAACTCACCG    | CTATTTCTTTGCCCTCGGACG     |

Supplementary Table S4. Sequences of primers used for the qRT-PCR.

| Target          | Forward primer (5' to 3') | Reverse primer (5' to 3') |
|-----------------|---------------------------|---------------------------|
| <i>NtActing</i> | TCCTGATGGGCAAGTGATTAC     | TTGTATGTGGTCTCGTGGATTC    |
| <i>CnGAPDH</i>  | GGGAATCCTTGGTACACTGAG     | ACCCCATTCGTTGTCATACC      |
| <i>CnCHI4</i>   | GTCCGTCACCCAAGTCCAGAT     | TGCCCCGAGGTTTCACA         |

Supplementary Table S5. Sequences of primers used for promoter cloning.

| Order | Order | Forward primer (5' to 3') | Reverse primer (5' to 3') |
|-------|-------|---------------------------|---------------------------|
| 1     | (1)   | GGTTCCAAGGCTTTGCTTATGGT   | CAGTCTTGCCCTTCCACTTAACG   |
|       | (2)   | CCGGTTTTTATGATTGGTTCTG    | GCGCTATCTTCGAGGTACACTCC   |
|       | (3)   | GGAAAAAGATAGCAATGGTGGAG   | AAACGTGGCTCTCGATCTGGACT   |
| 2     | (1)   | GGTTCCAAGGCTTTGCTTATGGT   | GAGTTGGGTTTGAAGTGATGTGT   |
|       | (2)   | CCGGTTTTTATGATTGGTTCTG    | TAATAGCATCCGTGAAGATTGAAA  |
| 3     | (1)   | TCCGGTTTTTATGATTGGTTCTG   | CAGTCTTGCCCTTCCACTTAACG   |
|       | (2)   | TCCGGTTTTTATGATTGGTTCTG   | GCGCTATCTTCGAGGTACACTCC   |
|       | (3)   | TCCGGTTTTTATGATTGGTTCTG   | AAACGTGGCTCTCGATCTGGACT   |

Supplementary Table S6. Sequences of primers used for dual-luciferase assays.

| Target                                       | Forward primer (5' to 3')                | Reverse primer (5' to 3')                  |
|----------------------------------------------|------------------------------------------|--------------------------------------------|
| <i>CHI4pro</i> (to <i>pGreenII0800-LUC</i> ) | GG <b>GGTACC</b> TCCGGTTTTTATGATTGGTTCTG | CG <b>GGATCC</b> TGCTCTCTCTTTCTCTCTCAGCAC  |
| <i>CnMYB7</i> (to <i>pGreenII62sk</i> )      | ACGC <b>GTCGAC</b> ATGGGACGGTCTCCTTGCT   | GG <b>GGTACC</b> TCATTTCATCTCCAAGCTTCTGTAA |

Supplementary Table S7. Sequences of primers used for Y1H assays.

| Target                            | Forward primer (5' to 3')               | Reverse primer (5' to 3')                  |
|-----------------------------------|-----------------------------------------|--------------------------------------------|
| <i>CHI4pro</i> (to <i>pHIS2</i> ) | <b>GGAATTC</b> AATTGTTCCATTGTTACCAATAAT | TCC <b>CCCGGG</b> AGTTAGAAAAGCGGCACAAGAGGG |
| <i>CnMYB7</i> (to <i>pGADT7</i> ) | GGAATTC <b>CATATG</b> GGACGGTCTCCTTGCT  | CG <b>GGATCC</b> TCATTTCATCTCCAAGCTTCTGTAA |
